# Supplementary material for: Keeping the Agenda Current: Evolution of Australian Lived Experience Mental Health Research Priorities
Source: Int J Environ Res Public Health. 2022 Jul 1;19(13):8101. doi: 10.3390/ijerph19138101 (PMC9265903; doi:10.3390/ijerph19138101)
Supplement: Supplementary file 1 [file ijerph-19-08101-s001.zip › ijerph-1767277-supplementary.pdf]

**Supplementary file S1.** Research priority ratings for consumers, carers and consumer/carers from the original study.

| Research Topic                                                                                                           | Topic Area                                  | Priority ranking (Percentage important ratings) |           |                    |
|--------------------------------------------------------------------------------------------------------------------------|---------------------------------------------|-------------------------------------------------|-----------|--------------------|
|                                                                                                                          |                                             | Consumer                                        | Carer     | Consumer/<br>Carer |
| How to implement internationally recognised models of peer support in Australia                                          | <i>Peer to Peer</i>                         | 1 (94)                                          | 24 (70)   | 72.5 (44)          |
| Over-representation of mental illness in the justice system                                                              | <i>Justice</i>                              | 2 (88)                                          | 1.5 (100) | 11 (78)            |
| How is psychosocial disability defined in the NDIS, and how will it impact consumers and carers in Australia?            | <i>National Disability Insurance Scheme</i> | 4.5 (88)                                        | 9 (80)    | 15.5 (76)          |
| How does the use of language include/exclude individuals?                                                                | <i>Language and Communication</i>           | 4.5 (88)                                        | 69 (44)   | 55.5 (56)          |
| Consumers' experiences of peer to peer services                                                                          | <i>Peer to Peer</i>                         | 4.5 (88)                                        | 39 (60)   | 64.5 (50)          |
| Social inclusion                                                                                                         | <i>Other</i>                                | 4.5 (88)                                        | 15.5 (78) | 44.5 (60)          |
| How participation works in practice (tokenism vs. real involvement)                                                      | <i>Consumer &amp; Carer Involvement</i>     | 7.5 (85)                                        | 24 (70)   | 11 (78)            |
| What is helpful in recovery-oriented services?                                                                           | <i>Experiences of Care</i>                  | 7.5 (85)                                        | 9 (80)    | 32 (65)            |
| Peer-led services - What are the gaps? (e.g. support groups)                                                             | <i>Peer to Peer</i>                         | 10 (84)                                         | 46.5 (56) | 55.5 (56)          |
| How to recruit and train peer workers - What is going on, and where? Where is it embedded? How are they being supported? | <i>Peer to Peer</i>                         | 10 (84)                                         | 39 (60)   | 55.5 (56)          |
| Mental health in LGBTIQ+ populations                                                                                     | <i>Other</i>                                | 10 (84)                                         | 46.5 (56) | 38.5 (63)          |

| Research Topic                                                                                                                                                                 | Topic Area                                  | Priority ranking (Percentage important ratings) |           |                    |
|--------------------------------------------------------------------------------------------------------------------------------------------------------------------------------|---------------------------------------------|-------------------------------------------------|-----------|--------------------|
|                                                                                                                                                                                |                                             | Consumer                                        | Carer     | Consumer/<br>Carer |
| How is the consumer and carer voice integrated into policy and services? How are their contributions valued, and what indicators exist to demonstrate how their voice is used? | <i>Services</i>                             | 12 (84)                                         | 52.5 (55) | 21.5 (71)          |
| How do we expand who is involved? (e.g. young people)                                                                                                                          | <i>Consumer &amp; Carer Involvement</i>     | 13 (82)                                         | 15.5 (78) | 64.5 (50)          |
| Is medication what we want? Side effects, health impacts, alternatives, efficacy, cost-effectiveness                                                                           | <i>Medication</i>                           | 14 (79)                                         | 34 (64)   | 59 (55)            |
| Stigma by health providers (mental health and others) - What do they believe and how does it impact?                                                                           | <i>Stigma</i>                               | 15.5 (79)                                       | 24 (70)   | 5 (83)             |
| Are consumers being consulted about their experiences of care?                                                                                                                 | <i>Experiences of Care</i>                  | 15.5 (79)                                       | 24 (70)   | 21.5 (71)          |
| Impact of service delivery on consumers and carers - What contributes to recovery?                                                                                             | <i>Services</i>                             | 17 (78)                                         | 58 (50)   | 7 (81)             |
| What programs/supports can be devised for reaching individuals that are outside of NDIS scope?                                                                                 | <i>National Disability Insurance Scheme</i> | 20.5 (78)                                       | 9 (80)    | 15.5 (76)          |
| Peer support in public mental health system                                                                                                                                    | <i>Peer to Peer</i>                         | 20.5 (78)                                       | 46.5 (56) | 24.5 (69)          |
| Accommodation                                                                                                                                                                  | <i>Other</i>                                | 20.5 (78)                                       | 46.5 (56) | 25.5 (69)          |
| Employment                                                                                                                                                                     | <i>Other</i>                                | 20.5 (78)                                       | 5 (89)    | 7 (81)             |
| Support in education settings                                                                                                                                                  | <i>Other</i>                                | 20.5 (78)                                       | 15.5 (78) | 77 (38)            |

| Research Topic                                                                                                                                                                                       | Topic Area                               | Priority ranking (Percentage important ratings) |           |                    |
|------------------------------------------------------------------------------------------------------------------------------------------------------------------------------------------------------|------------------------------------------|-------------------------------------------------|-----------|--------------------|
|                                                                                                                                                                                                      |                                          | Consumer                                        | Carer     | Consumer/<br>Carer |
| Culturally and linguistically diverse perspectives within mainstream mental health system                                                                                                            | <i>Other</i>                             | 20.5 (78)                                       | 69 (44)   | 32 (65)            |
| How do individuals adapt to changes in medication that impact lifestyle and quality of life?                                                                                                         | <i>Medication</i>                        | 24 (77)                                         | 52.5 (55) | 38.5 (63)          |
| Training of psychologists - How can consumer perspectives be incorporated?                                                                                                                           | <i>Health Professionals</i>              | 26.5 (76)                                       | 62.5 (45) | 44 .5 (60)         |
| Where do physical health concerns fit into health services when you have mental health problems as a main focus?                                                                                     | <i>Comorbidity &amp; Physical Health</i> | 26.5 (76)                                       | 39 (60)   | 11 (78)            |
| Discrimination                                                                                                                                                                                       | <i>Justice</i>                           | 26.5 (76)                                       | 15.5 (78) | 27.5 (67)          |
| How have people who have experienced trauma been cared for?                                                                                                                                          | <i>Experiences of Care</i>               | 26.5 (76)                                       | 39 (60)   | 21.5 (71)          |
| Trauma informed care - Why is it important, and how is it integrated into service delivery?                                                                                                          | <i>Services</i>                          | 29.5 (76)                                       | 39 (60)   | 42 (62)            |
| Reach – Are services reaching the people that need them?                                                                                                                                             | <i>Services</i>                          | 29.5 (76)                                       | 3 (91)    | 27.5 (67)          |
| Capacity for decision making/change in legislation and its application; consumer and carer experiences of this. What information is provided about legislation? What support is provided e.g. legal? | <i>Legislation</i>                       | 32.5 (75)                                       | 15.5 (78) | 47.5 (59)          |
| To what extent do we follow human rights legislation on mental illness?                                                                                                                              | <i>Legislation</i>                       | 32.5 (75)                                       | 24 (70)   | 15.5 (76)          |

| Research Topic                                                                                                                                | Topic Area                                  | Priority ranking (Percentage important ratings) |           |                    |
|-----------------------------------------------------------------------------------------------------------------------------------------------|---------------------------------------------|-------------------------------------------------|-----------|--------------------|
|                                                                                                                                               |                                             | Consumer                                        | Carer     | Consumer/<br>Carer |
| Recovery and fulfilling potential                                                                                                             | <i>Other</i>                                | 32.5 (75)                                       | 15.5 (78) | 64.5 (50)          |
| Suicide: continuous care and support                                                                                                          | <i>Other</i>                                | 32.5 (75)                                       | 5 (89)    | 7 (81)             |
| Is care traumatising?                                                                                                                         | <i>Experiences of Care</i>                  | 35 (74)                                         | 9 (80)    | 15.5 (76)          |
| Consumer and carer journey through service pathways - What works and what doesn't? What do clinicians think?                                  | <i>Services</i>                             | 36.5 (73)                                       | 34 (64)   | 52 (57)            |
| Care coordination between mental health and physical health                                                                                   | <i>Comorbidity &amp; Physical Health</i>    | 36.5 (73)                                       | 58 (50)   | 1 (89)             |
| Consumer perspectives on use of labels - Which terms are useful/helpful, which are not?                                                       | <i>Language and Communication</i>           | 38.5 (72)                                       | 69 (44)   | 47.5 (59)          |
| Mental health in culturally and linguistically diverse populations                                                                            | <i>Other</i>                                | 38.5 (72)                                       | 58 (50)   | 32 (65)            |
| Children of people with mental illness                                                                                                        | <i>Other</i>                                | 40 (71)                                         | 29.5 (67) | 38.5 (63)          |
| Awareness and role of General Practitioners (GPs) - e.g., engagement with carers, language and communication skills with consumers and carers | <i>Services</i>                             | 41.5 (70)                                       | 62.5 (46) | 15.5 (76)          |
| Exhaustion & burnout of mental health professionals - Impact on service support and delivery                                                  | <i>Health Professionals</i>                 | 41.5 (70)                                       | 34 (64)   | 32 (65)            |
| How many people with mental illness/disability are eligible for NDIS support?                                                                 | <i>National Disability Insurance Scheme</i> | 44.5 (69)                                       | 46.5 (56) | 60 (53)            |

| Research Topic                                                                                                                                            | Topic Area                        | Priority ranking (Percentage important ratings) |           |                    |
|-----------------------------------------------------------------------------------------------------------------------------------------------------------|-----------------------------------|-------------------------------------------------|-----------|--------------------|
|                                                                                                                                                           |                                   | Consumer                                        | Carer     | Consumer/<br>Carer |
| What forms of communication work for consumers and carers? (e.g. older people - less technology familiarity; younger people - social media, smart phones) | <i>Language and Communication</i> | 44.5 (69)                                       | 84 (30)   | 19 (75)            |
| Care planning - What makes a good mental health plan? (e.g. individualised, including perspectives of consumers, carers and clinicians)                   | <i>Treatment</i>                  | 44.5 (69)                                       | 34 (64)   | 3.5 (84)           |
| Transparency of clinical management - How does it respond and interact with consumers and carers?                                                         | <i>Treatment</i>                  | 44.5 (69)                                       | 58 (50)   | 3.5 (84)           |
| What are the experiences of and needs of people coming off medication? How are they being supported?                                                      | <i>Medication</i>                 | 47 (68)                                         | 62.5 (45) | 9 (80)             |
| How mental health-aware are General Practitioners (GPs)?                                                                                                  | <i>Health Professionals</i>       | 49.5 (67)                                       | 34 (64)   | 38.5 (63)          |
| What is the role of a General Practitioner (GP) -perceived and actual) - as part of the therapeutic alliance in care of mental health consumers?          | <i>Health Professionals</i>       | 49.5 (67)                                       | 52.5 (55) | 26 (68)            |
| Stigma around Borderline Personality Disorder                                                                                                             | <i>Stigma</i>                     | 49.5 (67)                                       | 81 (33)   | 76 (39)            |
| Stigma as a barrier to consumer involvement                                                                                                               | <i>Stigma</i>                     | 49.5 (67)                                       | 46.5 (56) | 43 (61)            |
| Alternative treatments - What are they, and how can they contribute to recovery?<br>Holistic approaches, meditation, exercise                             | <i>Treatment</i>                  | 52.5 (66)                                       | 76.5 (36) | 75 (40)            |

| Research Topic                                                                                 | Topic Area                              | Priority ranking (Percentage important ratings) |           |                    |
|------------------------------------------------------------------------------------------------|-----------------------------------------|-------------------------------------------------|-----------|--------------------|
|                                                                                                |                                         | Consumer                                        | Carer     | Consumer/<br>Carer |
| Learned helplessness (experience with services)                                                | <i>Other</i>                            | 52.5 (66)                                       | 69 (44)   | 55.5 (56)          |
| Consumers & Carers - Who is involved?                                                          | <i>Consumer &amp; Carer Involvement</i> | 55 (64)                                         | 15.5 (78) | 55.5 (56)          |
| Does the stigma in the mental health system worsen outcomes?                                   | <i>Stigma</i>                           | 55 (64)                                         | 29.5 (67) | 32 (65)            |
| What is the effect of caring?                                                                  | <i>Carers, Family and Friends</i>       | 55 (64)                                         | 5 (89)    | 15.5 (76)          |
| What sources of information do consumers and carers have faith in?                             | <i>Language and Communication</i>       | 57 (63)                                         | 81 (33)   | 64.5 (50)          |
| How can medications be tailored to the individual?                                             | <i>Medication</i>                       | 58.5 (62)                                       | 62.5 (45) | 50.5 (58)          |
| Criteria for prescribing medications                                                           | <i>Medication</i>                       | 58.5 (62)                                       | 52.5 (55) | 38.5 (63)          |
| What are clinician views on peer support?                                                      | <i>Peer to Peer</i>                     | 60.5 (61)                                       | 81 (33)   | 72.5 (44)          |
| Risk factors for mental illness                                                                | <i>Other</i>                            | 60.5 (61)                                       | 46.5 (56) | 32 (65)            |
| How can we get mental health and other health professionals to work together more efficiently? | <i>Health Professionals</i>             | 63.5 (61)                                       | 20 (73)   | 50.5 (58)          |
| Comorbidities and stigma                                                                       | <i>Stigma</i>                           | 63.5 (61)                                       | 69 (44)   | 64.5 (50)          |
| What changes do people make in their own lives as a result of stigma?                          | <i>Stigma</i>                           | 63.5 (61)                                       | 46.5 (56) | 55.5 (56)          |
| Who are the carers and what are they doing?                                                    | <i>Carers, Family and Friends</i>       | 63.5 (61)                                       | 24 (70)   | 47.5 (59)          |

| Research Topic                                                                                                              | Topic Area                               | Priority ranking (Percentage important ratings) |           |                    |
|-----------------------------------------------------------------------------------------------------------------------------|------------------------------------------|-------------------------------------------------|-----------|--------------------|
|                                                                                                                             |                                          | Consumer                                        | Carer     | Consumer/<br>Carer |
| Translation of clinical frameworks and guidelines into practice - Why is there a disconnect?                                | <i>Treatment</i>                         | 66 (60)                                         | 52.5 (55) | 38.5 (63)          |
| Carers & bereavement – Are we offering enough counselling? Is it timely enough? Should it be offered in prisons?            | <i>Carers, Family and Friends</i>        | 67.5 (59)                                       | 9 (80)    | 32 (65)            |
| What is a peer?                                                                                                             | <i>Peer to Peer</i>                      | 67.5 (59)                                       | 81 (33)   | 86 (19)            |
| What support is available when pain is a comorbid condition? How are people experiencing that?                              | <i>Comorbidity &amp; Physical Health</i> | 70.5 (58)                                       | 85 (22)   | 64.5 (50)          |
| What is the evidence base linking mental illness with alcohol and other drugs?                                              | <i>Comorbidity &amp; Physical Health</i> | 70.5 (58)                                       | 29.5 (67) | 64.5 (50)          |
| What kind of support would carers like?                                                                                     | <i>Carers, Family and Friends</i>        | 70.5 (58)                                       | 1.5 (100) | 21.5 (71)          |
| Is there such a thing as carer recovery?                                                                                    | <i>Carers, Family and Friends</i>        | 70.5 (58)                                       | 15.5 (78) | 2 (88)             |
| How do current protocols support consumer and carer journeys to recovery?                                                   | <i>Treatment</i>                         | 73.5 (57)                                       | 24 (70)   | 69 (47)            |
| How are Partners in Recovery (PiR), Personal Helpers and Mentors (PHaMs), support and clinical management working together? | <i>Services</i>                          | 73.5 (57)                                       | 76.5 (36) | 74 (43)            |
| Bullying                                                                                                                    | <i>Other</i>                             | 75 (56)                                         | 81 (33)   | 72.5 (44)          |
| Trial of primary health care nurse within mental health teams – Does it improve physical health outcomes?                   | <i>Comorbidity &amp; Physical Health</i> | 76.5 (55)                                       | 74 (40)   | 84 (28)            |

| Research Topic                                                                                                              | Topic Area                               | Priority ranking (Percentage important ratings) |           |                    |
|-----------------------------------------------------------------------------------------------------------------------------|------------------------------------------|-------------------------------------------------|-----------|--------------------|
|                                                                                                                             |                                          | Consumer                                        | Carer     | Consumer/<br>Carer |
| Analysis of stigma according to disorder                                                                                    | <i>Stigma</i>                            | 76.5 (55)                                       | 69 (44)   | 47.5 (59)          |
| Bereavement                                                                                                                 | <i>Other</i>                             | 78 (53)                                         | 69 (44)   | 82 (31)            |
| How is 'privacy' interpreted by health professionals, and does it differ from consumer and carer interpretations?           | <i>Health Professionals</i>              | 79.5 (52)                                       | 52.5 (55) | 81 (32)            |
| Stereotype formation                                                                                                        | <i>Stigma</i>                            | 79.5 (52)                                       | 58 (50)   | 79.5 (33)          |
| Insurance                                                                                                                   | <i>Other</i>                             | 81 (50)                                         | 29.5 (67) | 85 (25)            |
| Gender specific effects of medication                                                                                       | <i>Medication</i>                        | 82 (47)                                         | 87 (18)   | 78 (35)            |
| Effects of drug and alcohol use early in life                                                                               | <i>Comorbidity &amp; Physical Health</i> | 83 (39)                                         | 69 (44)   | 72.5 (44)          |
| Electroconvulsive therapy (ECT) - What information is given, does it follow best practice, what are consumers' experiences? | <i>Treatment</i>                         | 84.5 (31)                                       | 86 (20)   | 83 (30)            |
| Smoking cessation                                                                                                           | <i>Other</i>                             | 85.5 (31)                                       | 69 (44)   | 87 (7)             |
| Do the public and private sectors work together?<br>Consumer and carer experiences                                          | <i>Services</i>                          | 86 (30)                                         | 76.5 (36) | 79.5 (33)          |

Note: Items are ranked in descending order of consumer importance rating percentages [from 1 (most frequently rated as "important") to 87 (least frequently rated as "important")]. The percentage rankings for the carer and consumer/carers participant groups are provided for comparison. Items sharing the same importance rating percentage were assigned a mean rank.
